# Supplementary material for: Salt Taste Genotype, Dietary Habits and Biomarkers of Health: No Associations in an Elderly Cohort
Source: PubMed Central journal article supplement (PMC7231396; doi:10.3390/nu12041056), 2020-04-10
Supplement: nutrients-12-01056-s001.pdf [file nutrients-12-01056-s001.pdf]

Supplementary Table S1. Stratified Analyses

|                             | Tukey HSD p-values |      |             |     |                   |           |           |                  |           |              |                    |            |          |
|-----------------------------|--------------------|------|-------------|-----|-------------------|-----------|-----------|------------------|-----------|--------------|--------------------|------------|----------|
|                             | Sex                |      | Age (years) |     | Income (per year) |           | Education |                  |           | Smoking      |                    | BMI        |          |
|                             | Female             | Male | 65-79       | ≥80 | <\$20,000         | >\$20,000 | ≤Trade    | TAFE/certificate | ≥Bachelor | Never smoked | History of smoking | ≤24.9kg/m2 | ≥25kg/m2 |
| <b>Sodium Intake (mg)</b>   |                    |      |             |     |                   |           |           |                  |           |              |                    |            |          |
| C/C - T/T                   | 0.5                | 0.5  | 0.3         | 0.9 | 1.0               | 0.4       | 0.8       | 0.6              | 0.1       | 0.5          | 0.7                | 1.0        | 0.3      |
| C/C - C/T                   | 0.8                | 0.6  | 0.2         | 0.9 | 0.9               | 0.6       | 0.7       | 0.6              | 0.1       | 0.9          | 0.4                | 1.0        | 0.2      |
| C/T - T/T                   | 0.7                | 0.9  | 0.9         | 0.3 | 0.9               | 0.8       | 0.9       | 1.0              | 1.0       | 0.5          | 0.8                | 1.0        | 1.0      |
| <b>DIET QUALITY INDICES</b> |                    |      |             |     |                   |           |           |                  |           |              |                    |            |          |
| DGI                         |                    |      |             |     |                   |           |           |                  |           |              |                    |            |          |
| C/C - T/T                   | 0.3                | 0.9  | 0.9         | 0.3 | 1.0               | 0.5       | 0.6       | 0.4              | 0.4       | 0.7          | 0.5                | 0.3        | 0.6      |
| C/C - C/T                   | 0.6                | 0.9  | 0.7         | 1.0 | 0.9               | 0.8       | 0.8       | 0.6              | 0.9       | 0.9          | 0.7                | 1.0        | 0.4      |
| C/T - T/T                   | 0.7                | 1.0  | 0.8         | 0.1 | 1.0               | 0.9       | 0.8       | 0.8              | 0.6       | 1.0          | 0.9                | 0.1        | 0.9      |
| ARFS                        |                    |      |             |     |                   |           |           |                  |           |              |                    |            |          |
| C/C - T/T                   | 0.2                | 0.9  | 0.9         | 0.2 | 1.0               | 0.7       | 0.7       | 0.4              | 0.8       | 1.0          | 0.4                | 0.2        | 0.6      |
| C/C - C/T                   | 0.6                | 0.9  | 0.8         | 0.9 | 1.0               | 0.4       | 0.9       | 0.7              | 1.0       | 1.0          | 0.7                | 0.9        | 0.5      |
| C/T - T/T                   | 0.5                | 1.0  | 1.0         | 0.1 | 1.0               | 0.7       | 0.9       | 0.7              | 0.8       | 1.0          | 0.7                | 0.1        | 1.0      |
| AUST-HEI                    |                    |      |             |     |                   |           |           |                  |           |              |                    |            |          |
| C/C - T/T                   | 0.6                | 0.8  | 1.0         | 1.0 | 0.9               | 1.0       | 1.0       | 1.0              | 0.8       | 0.6          | 0.5                | 0.2        | 0.6      |
| C/C - C/T                   | 0.6                | 0.4  | 1.0         | 0.6 | 0.5               | 0.8       | 1.0       | 0.8              | 1.0       | 0.9          | 0.7                | 0.9        | 0.5      |
| C/T - T/T                   | 1.0                | 1.0  | 1.0         | 0.6 | 1.0               | 1.0       | 1.0       | 0.8              | 0.8       | 0.7          | 0.9                | 0.1        | 1.0      |
| <b>URINE MARKERS</b>        |                    |      |             |     |                   |           |           |                  |           |              |                    |            |          |
| Creat (mmol/L)              |                    |      |             |     |                   |           |           |                  |           |              |                    |            |          |
| C/C - T/T                   | 0.9                | 0.9  | 1.0         | 1.0 | 1.0               | 1.0       | 0.9       | 0.8              | 0.9       | 1.0          | 1.0                | 0.8        | 1.0      |
| C/C - C/T                   | 0.8                | 0.9  | 0.8         | 0.9 | 1.0               | 0.8       | 0.8       | 1.0              | 0.5       | 1.0          | 0.7                | 0.5        | 1.0      |
| C/T - T/T                   | 0.9                | 0.5  | 0.6         | 0.5 | 0.9               | 0.5       | 0.9       | 0.5              | 0.7       | 0.9          | 0.5                | 0.7        | 0.9      |
| Alb (mmol/L)                |                    |      |             |     |                   |           |           |                  |           |              |                    |            |          |
| C/C - T/T                   | 1.0                | 0.9  | 1.0         | 1.0 | 0.6               | 1.0       | 1.0       | 0.8              | 1.0       | 1.0          | 0.9                | 0.5        | 1.0      |
| C/C - C/T                   | 0.7                | 0.3  | 0.5         | 0.5 | 0.7               | 0.3       | 0.7       | 0.3              | 1.0       | 0.5          | 0.5                | 0.9        | 0.3      |
| C/T - T/T                   | 0.5                | 0.3  | 0.4         | 0.3 | 0.9               | 0.1       | 0.4       | 0.4              | 0.8       | 0.2          | 0.6                | 0.7        | 0.1      |
| Alb/Creat Ratio (mg/mmol)   |                    |      |             |     |                   |           |           |                  |           |              |                    |            |          |
| C/C - T/T                   | 1.0                | 1.0  | 1.0         | 1.0 | 1.0               | 1.0       | 1.0       | 0.8              | 1.0       | 1.0          | 0.9                | 0.6        | 1.0      |
| C/C - C/T                   | 0.7                | 0.4  | 0.6         | 0.5 | 0.6               | 0.5       | 0.7       | 0.3              | 1.0       | 0.5          | 0.6                | 0.9        | 0.3      |

|           |     |     |     |     |     |     |     |     |     |     |     |     |     |
|-----------|-----|-----|-----|-----|-----|-----|-----|-----|-----|-----|-----|-----|-----|
| C/T - T/T | 0.5 | 0.3 | 0.4 | 0.4 | 0.4 | 0.4 | 0.4 | 0.4 | 0.9 | 0.2 | 0.6 | 0.6 | 0.1 |
|-----------|-----|-----|-----|-----|-----|-----|-----|-----|-----|-----|-----|-----|-----|

**Supplementary Table S2. Diet quality indices with sex, income, education and smoking**

| Variable                   | DGI        |              | AUST-HEI |                   | ARFS     |     |
|----------------------------|------------|--------------|----------|-------------------|----------|-----|
|                            | Mean ±SD   | p            | Mean ±SD | p                 | Mean ±SD | p   |
| Sex                        |            |              |          |                   |          |     |
| Males                      | 95.6±15.0  | <b>0.007</b> | 28.7±9.7 | <b>&lt;0.0001</b> | 27.0±7.7 | 0.1 |
| Females                    | 99.7±16.1  |              | 32.6±9.0 |                   | 28.3±7.8 |     |
| Income                     |            |              |          |                   |          |     |
| < \$20,000 per year        | 97.9±16.8  | 0.8          | 30.7±9.8 | 0.9               | 27.9±8.3 | 0.7 |
| > \$20,000 per year        | 97.4±15.1  |              | 30.7±9.3 |                   | 27.5±7.5 |     |
| Education                  |            |              |          |                   |          |     |
| ≤ Trade qualification      | 95.4±16.5  | <b>0.04</b>  | 29.1±9.7 | <b>0.02</b>       | 26.7±7.8 | 0.8 |
| TAFE or other certificates | 97.2±15.6  |              | 31.0±9.6 |                   | 27.8±7.8 |     |
| ≥ Bachelor degree          | 100.3±14.8 |              | 32.1±8.6 |                   | 28.6±7.0 |     |
| Smoking                    |            |              |          |                   |          |     |
| History of smoking         | 96.1±15.6  | <b>0.03</b>  | 30.5±9.6 | 0.7               | 27.1±7.6 | 0.1 |
| Never smoked               | 99.2±15.8  |              | 20.8±9.3 |                   | 28.3±7.9 |     |
